# Supplementary material for: HCS-Splice: A High-Content Screening Method to Advance the Discovery of RNA Splicing-Modulating Therapeutics
Source: Preprints.org preprint supplement (doi:10.20944/preprints202306.1818.v1), 2023-06-26
Supplement: Supplementary file 1 [file supplementary]

Supplemental Figures and Legend

A Minigene PFlare5A-Tau10 WT

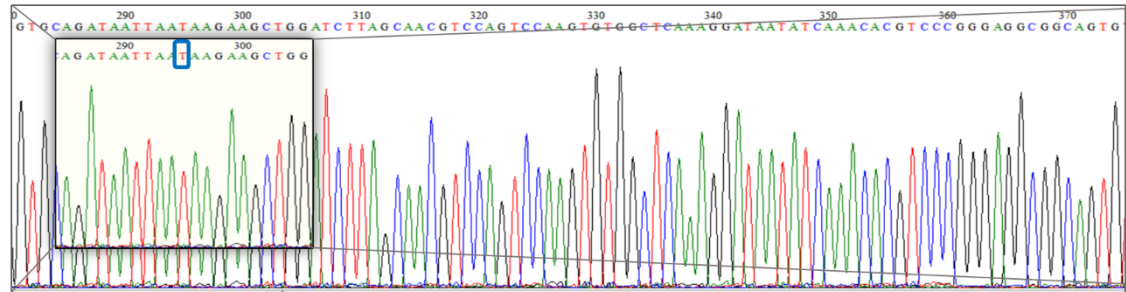

B Minigene PFlare5A-Tau10 mut

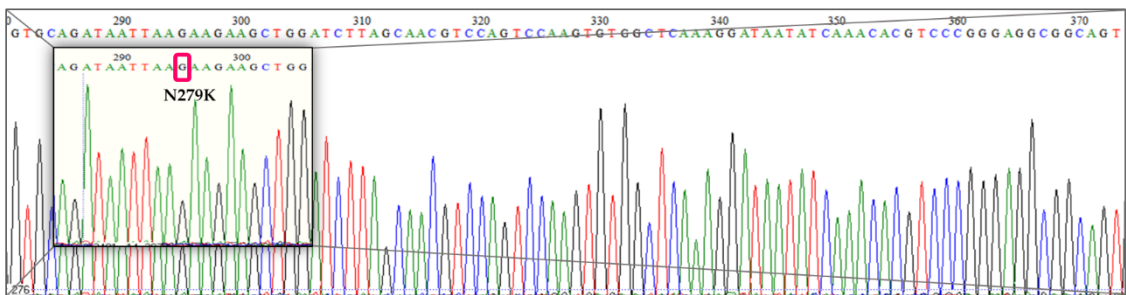

**Figure S1. Chromatogram sequence.** (a) of PFlare5A-Tau10 WT reporter plasmid (Minigene PFlare5A-Tau10 WT) and (b) of PFlare5A-Tau10 mut reporter plasmid (Minigene PFlare5A-Tau10 mut). Chromatogram shows the correct position of N279K point mutation in the PFlare5A-Tau10 mut reporter plasmid (BMR genomics, Padova, Italy).

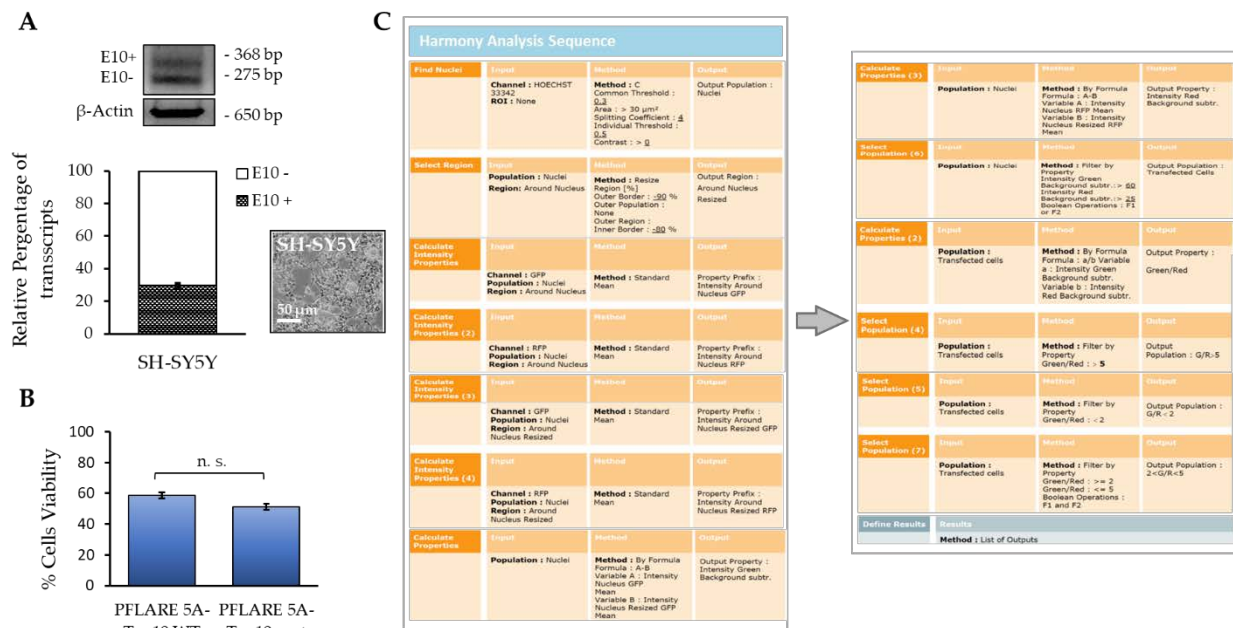

**Figure S2. SH-SY5Y cell lines analysis and overall HCS-splice protocol procedure. (a)** Semiquantitative RT-PCR of Exon 10 endogenous expression levels in the SH-SY5Y cell line was performed as described in the material and methods section.  $\beta$  actin was used as a housekeeping gene (650 bp), and values were represented as mean  $\pm$  SD (n=3). **(b)** Percentage of cell viability in SH-SY5Y cells after transfection (48 hours) was measured by the Trypan Blue assay. Data represent mean  $\pm$  SEM obtained from triplicates. **(c)** Representative steps of the Harmony analysis protocol workflow used for the HCS-splice methods.

**A**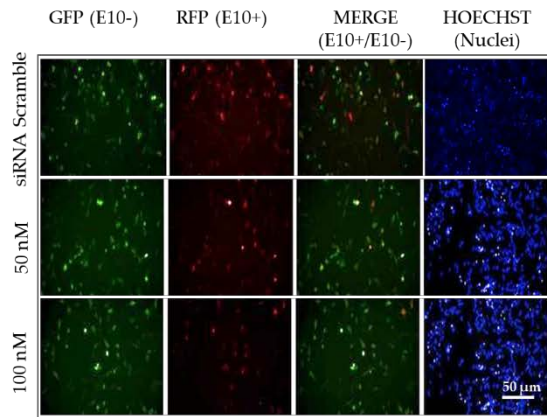**B**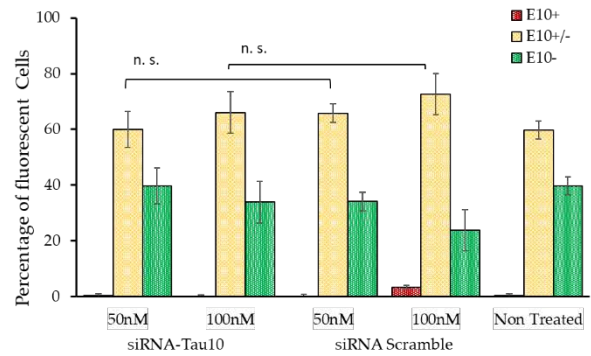

**Figure S3. Exon 10 expression of PFlare5A-Tau10 WT report plasmid after treatment with siRNA-Tau10.**

**(a)** Representative images of SH-SY5Y cell line cotransfected with Minigene PFlare5A-Tau10 WT and treated with siRNA-Tau10 at concentrations of 50 and 100 nM (Top to bottom). The cells were acquired by a High-Content screening system (Operetta, PerkinElmer) after 48 hours of treatments, as described in Figure 2. The scale bar represents 50  $\mu$ m. **(b)** The histogram represents the relative percentages of the three sub-populations of cells containing the reporter treated respectively with siRNA-Tau10 and Scramble siRNA control at a concentration of 50 nM and 100 nM. The values represent mean  $\pm$  SD (n=3). Asterisks (\*) indicate significant differences (t-test, n.s.  $P > 0.05$ , \* $P \leq 0.05$ , \*\* $P \leq 0.01$ , \*\*\* $P \leq 0.001$ , \*\*\*\*  $P \leq 0.0001$ ).
